# Supplementary material for: Live virus neutralisation testing in convalescent patients and subjects vaccinated against 19A, 20B, 20I/501Y.V1 and 20H/501Y.V2 isolates of SARS-CoV-2
Source: bioRxiv or medRxiv preprint supplement (doi:10.1101/2021.05.11.21256578), 2021-05-11
Supplement: Supplementary file [file media-1.pdf]

1 **Figure 1.** Neutralisation of living isolates of SARS-CoV-2 by convalescent sera from critical or mild  
2 patients with COVID-19 and by vaccine-elicited sera from subjects having received two doses of the  
3 BNT162b2 vaccine.

4 \*: p-value <0.05; \*\*: p-value <0.01; \*\*\*: p-value <0.001; \*\*\*\*: p-value <0.0001; ns: non-significant.

5 Each serum was tested in duplicate and the mean NAb was used for the analysis. Titres were  
6 transformed into  $\log_2$  values for the calculation of mean NAb titres (a value of 0.5 was attributed by  
7 convention to negative samples). In panels A, B and C: dotted lines represent the detection threshold  
8 of 50% plaque reduction neutralisation test (PRNT<sub>50</sub>)  $\geq 20$  for neutralising antibody (NAb) titres; full  
9 lines represent median NAb titres and dash-dotted lines represent the 25% and 75% quartiles.

10 (A) Violin plot presenting the neutralisation of 2 SARS-CoV-2 isolates belonging to the 19A and 20B  
11 clades by serum specimens obtained from subjects tested 6-months post mild COVID-19 (n=19) and  
12 critical patients (n=15); the Wilcoxon matched-pair signed rank test was used for comparisons.

13 (B) Violin plot presenting the neutralisation of a SARS-CoV-2 isolate belonging to the 19A clade by  
14 serum specimens obtained from vaccinated subjects (n=30), 6-months post mild COVID-19 subjects  
15 (n=29) and critical patients (n=25); the Kruskal-Wallis test followed by Dunn's multiple comparison test  
16 was used for comparisons.

17 (C) Violin plots presenting the neutralisation of 3 SARS-CoV-2 isolates belonging to the 19A,  
18 20I/501Y.V1 and 20H/501Y.V2 clades by the same serum specimens than in (B); the Friedman test  
19 followed by Dunn's multiple comparison test was used for comparisons.

20 (D) Capacity of neutralisation of the two tested VOC (20I/501Y.V1 and 20H/501Y.V2 clades) by the  
21 same serum specimens as that in (B) and (C) in comparison to a 19A isolate taken as reference; the  
22 Wilcoxon matched-pair signed rank test was used for comparisons.
